# Supplementary material for: Functional and Genetic Characterization of Porcine Beige Adipocytes
Source: MDPI journal article supplement (doi:10.3390/cells11040751), 2022-02-21
Supplement: s1 [file s1]

**Table S3.** The primers for qPCR

| Name   | Sequence                                                |
|--------|---------------------------------------------------------|
| UCP3   | F: CAACAGGAAGTACAGCGGGA<br>R: GTGATGTTGGGCAGAATTCCTTT   |
| PDK4   | F: GGCAGCAGTGGTCCAAGAT<br>R: CGACTGTAGCCCTCATTGCA       |
| CIDEA  | F: GTCAAGGCCACCATGTACGA<br>R: AGCATTCGGAGCATGTACGT      |
| EBF2   | F: AACAACGGCACCCTACTACAA<br>R: TATGGGCTGCTTGGTGA CTG    |
| DIO2   | F: CCTCTTCCTGGCGCTCTATG<br>R: GTAGGCATCGAGGAGGAAGC      |
| CD137  | F: ACTGTGCTGCTGGTCATGAA<br>R: AACACCTTCACACTTCCTGCA     |
| ADCY5  | F: CAGACATCAACGCCAAGCAG<br>R: AAGCCCTCGATGTCAGCAAA      |
| LEPTIN | F: TGGCCCTATCTGTCCTACGT<br>R: TGGACAGACTCAGGACAGGA      |
| TCF21  | F: AGGCTCAAGACCACACTGC<br>R: TCTTTCAGGTCACTTTCGGGTT     |
| ADIPOQ | F: AGATTGGCTGGTTGATGCTCA<br>R: AAACCAGATGTCACACTTGCC    |
| FABP4  | F: GGCCAAACCCAACCTGATCA<br>R: CATCCCCTTCTGCACCTGT       |
| PPARG  | F: GTCATGGGTGAAACTCTGGGA<br>R: TGTCAACCATGGTCACCTCTTG   |
| ITGA2  | F: GGCCTCCCAGAAGCAAAGAT<br>R: TCTCCCATTCGGTTCTCAGGA     |
| HMGA1  | F: GGAAAAGGACGGCACTGAGA<br>R: CTTCTGACTCCCTACCAGCG      |
| HMGA2  | F: AAGAGTCCCTCCAAAGCAGC<br>R: CACCCATTTCCTAGGTCTGCC     |
| HMGB1  | F: TTTGAAGACATGGCAAAGGCG<br>R: AAAACAAGAAAAAGGCCGAAGGAG |
| HMGB2  | F: CAAGGGTGACAAGAAGGGCA<br>R: CTTTGGGCGATGTTTCAGAGC     |
| BMP2   | F: CCTACATGCTGGACCTGTACC<br>R: TTAAAGAAGAAGCGCCGGGT     |

|         |                                                        |
|---------|--------------------------------------------------------|
| CTCF    | F: TAGTGGAGAATTGGTGCGGC<br>R: GTGTCCCTGCTGGCATAACT     |
| AMCF-II | F: AGGCGGCTGTAGTGAGAGA<br>R: CCATTCTTCAGGGTGGCTATCA    |
| KIF18A  | F: CTGCTGAACCTGGAGTGATGTA<br>R: ACCCTTGAACGACTACCCCT   |
| ANKZF1  | F: CAGCGATGATAATGAGGGGGCT<br>R: AGGTCTCGTTTCCTCTCCCT   |
| SEMA3A  | F: CAGAAGGGATGAATGCAAGTGG<br>R: GCAAATTGGATGAAAAGCCCCA |
| CNN1    | F: AGCCCCACGACATCTTTGAA<br>R: CCACGTTACCTTGTTCCCT      |
| IGFBP5  | F: GTTTGCCTCAACGAAAAGAGCT<br>R: TCAGCTTCTTTCTGCGGTCC   |
| COL1A1  | F: CATGACCGAGACGTGTGGAA<br>R: GGACAGTTCTTGATTTCTGTCGC  |
| RIMKLB  | F: GGACATTTCAAGAGTTGGCAGG<br>R: CACGTACATCCCTTCCATGAGA |
| COL11A1 | F: AACTCAGTGCCCCAACGAAA<br>R: ATCGCCCCAACCTCAATACCG    |
| STC2    | F: GCAGAACACAGCGGAAATCC<br>R: TCCCATGTAAGCCCCGAATC     |
| HSPB6   | F: TGAGCACGGATACATCGCG<br>R: GATGGACAGGACGCCTTCAG      |
| ZNF423  | F: GCGCTCGGTGAAAGTTGAAG<br>R: TCACGCTGTTCTGTCTTCC      |
| ADGRD1  | F: GAACATTGGCATCCTCATCGC<br>R: CAGCAAGCACACCAAAGAGC    |
| 18S     | F: GTAACCCGTTGAACCCCAT<br>R: CCATCCAATCGGTAGTAGCG      |

---
